# Supplementary material for: High Rate of Depression among Saudi Children with Type 1 Diabetes
Source: MDPI journal article supplement (doi:10.3390/ijerph182111714), 2021-11-08
Supplement: s1 [file s1]

Classification of depression:

Male:

| age                                     | Non  | mild  | moderate | sever      |
|-----------------------------------------|------|-------|----------|------------|
| 7 years+6months to 10 years+ 5 months   | 0-14 | 15-22 | 23-29    | 30 or more |
| 10 years +6 months to 13years+ 5 months | 0-14 | 15-21 | 22-27    | 28 or more |
| 13 years+ 6months to 16 years+ 5 months | 0-14 | 15-21 | 22-28    | 29 or more |

Female:

| age                                     | Non  | mild  | moderate | sever      |
|-----------------------------------------|------|-------|----------|------------|
| 7 years+6months to 10 years+ 5 months   | 0-14 | 15-22 | 23-29    | 30 or more |
| 10 years +6 months to 13years+ 5 months | 0-16 | 17-23 | 24-30    | 31 or more |
| 13 years+ 6months to 16 years+ 5 months | 0-18 | 19-24 | 25-30    | 31or more  |
